# Supplementary material for: The Epstein-Barr Virus-Encoded MicroRNA MiR-BART9 Promotes Tumor Metastasis by Targeting E-Cadherin in Nasopharyngeal Carcinoma
Source: PubMed Central journal article supplement (PMC3937311; doi:10.1371/journal.ppat.1003974), 2014-02-27
Supplement: ppat.1003974.s008.pdf [file ppat.1003974.s008.pdf]

**Table S1 Synthetic RNA; Locked Nucleic Acid (LNA); Cloning primer**

| Gene                         |                                                                                                                                                                                                                                      |
|------------------------------|--------------------------------------------------------------------------------------------------------------------------------------------------------------------------------------------------------------------------------------|
| ebv-miR-BART9-3p RNA         | 5'- rUrArA rCrArc rUrUrC rArUrG rGrGrU rCrCrC rGrUrA rGrU -3'                                                                                                                                                                        |
| hsa-miR-21-5p RNA            | 5'- rUrArG rCrUrU rArUrC rArGrA rCrUrG rArUrG rUrUrG rA -3'                                                                                                                                                                          |
| microRNA inhibitor control   | 5' - GTGTAACACGTCTATACGCCCA -3' (EXIQON; 199004-00)                                                                                                                                                                                  |
| miR-BART9-3p LNA             | 5' -ACTACGGGACCCATGAAGTGTTA -3' (EXIQON; 136042-00)                                                                                                                                                                                  |
| Pre-miR-BART9 cloning primer | Sense :<br>TGCTGCAGCTGTTGTTTGTACTGGACCCTGAATTGGAAACAGTAACTTGGAT<br>TCTGTAACACTTCATGGGTCCCGTAGTGACAACACTATGCTG<br>Anti-sense :<br>CCTGCAGCATAGTTGTCACACTACGGGACCCATGAAGTGTTACAGAATCCAAG<br>TTACTGTTTCCAATTCAGGGTCCAGTACAAAACAACAGCTGC |
| CDH1-3'UTR Mut               | Forward :TTACTGTTTCTCAAGCA      Reverse :ATTTTTTCTCCAAAGTGCTT<br>CTTTGG AGAAAAAAT                      GAGAAACAGTAA                                                                                                                  |
| miR-BART9 sensor             | Forward :AGCTTAACACTTCATGG      Reverse :CTAGACTACGGGACCCATGA<br>GTCCCGTAGTGATAACACTTCAT      AGTGTTATCACTACGGGACCCATGAAG<br>GGGTCCCGTAGT                              TGTTA                                                         |
