# Supplementary material for: The Epstein-Barr Virus-Encoded MicroRNA MiR-BART9 Promotes Tumor Metastasis by Targeting E-Cadherin in Nasopharyngeal Carcinoma
Source: PubMed Central journal article supplement (PMC3937311; doi:10.1371/journal.ppat.1003974), 2014-02-27
Supplement: ppat.1003974.s009.pdf [file ppat.1003974.s009.pdf]

**Table S2\_ Primers for quantitative RT-PCR analysis**

| Gene         | Forward Primer (5'-3')    | Reverse Primer (5'-3')     |
|--------------|---------------------------|----------------------------|
| miR-BART9-3p | CGGCGGTAACACTTCATGGGTC    | CTGGTGTCTGGAGTCGGCAATTC    |
| miR-21       | CGGCGGTAGCTTATCAGACTGA    | CTGGTGTCTGGAGTCGGCAATTC    |
| miR-93       | CGGCGGAAAGTGCTGTTCGTGC    | CTGGTGTCTGGAGTCGGCAATTC    |
| U6           | CTCGCTTCGGCAGCACA         | AACGCTTCACGAATTTGCGT       |
| LMP1         | GTCCTCTATTCCTTTGCTCTCATG  | TGCCTGTCCGTGCAAATTC        |
| LMP2A        | CCGTCACTCGGACTATCAAC      | TGAGATGAGTCATCCCGTGGA      |
| EBNA1        | AGGATGCGATTAAGGACCTTGTT   | CCATCGTCAAAGCTGCACAC       |
| MMP1         | GATGGACCTGGAGGAAATC       | GTCCAAGAGAATGGCCGA         |
| MMP2         | CTGGAGAAGTAGAGAAGGACC     | CCTGGGAGGAGTACAGTCA        |
| MMP9         | CCACTGCTGGCCCTTCTA        | CCCTGCCCTCAGAGAAT          |
| MMP10        | CTAGACTAATAGCTGATGACTTTCC | TGTTACTCTTTAATATGTGTGTCACC |
| MMP12        | ATGGACCCTGGTTATCCC        | ACGTTGGAGTAGGAAGTCA        |
| CDH1         | CTGAAGTGACTCGTAACGAC      | ACGAGCAGAGAATCATAAGG       |
| CTNNA1       | AGTCACTGTTTCGTCACCTCA     | ACAGCTAGAAGTAGGCTCC        |
| Vimentin     | ACATTGAGATTGCCACCTAC      | AACCGTCTTAATCAGAAGTGTC     |
| EEF1A1       | CAATGTGGGCTTCAATGTCAA     | CATAGCCGGCGCTTATTTG        |
