# Supplementary material for: The Epstein-Barr Virus-Encoded MicroRNA MiR-BART9 Promotes Tumor Metastasis by Targeting E-Cadherin in Nasopharyngeal Carcinoma
Source: PubMed Central journal article supplement (PMC3937311; doi:10.1371/journal.ppat.1003974), 2014-02-27
Supplement: ppat.1003974.s010.pdf [file ppat.1003974.s010.pdf]

**Table S3\_Enrichment analysis of predicted miR-BART9 targets in KEGG cell signaling pathway database**

| Pathway                               | Count | P_value  | Enrichment |
|---------------------------------------|-------|----------|------------|
| Small cell lung cancer                | 17    | 7.70E-03 | 2          |
| Pathways in cancer                    | 47    | 9.40E-03 | 1.4        |
| Pathogenic Escherichia coli infection | 12    | 2.30E-02 | 2.1        |
| Focal adhesion                        | 30    | 2.50E-02 | 1.5        |
| Amyotrophic lateral sclerosis (ALS)   | 11    | 3.40E-02 | 2.1        |
| p53 signaling pathway                 | 13    | 3.40E-02 | 1.9        |
| ECM-receptor interaction              | 15    | 3.60E-02 | 1.8        |
| Cell cycle                            | 20    | 3.90E-02 | 1.6        |
| Regulation of actin cytoskeleton      | 30    | 5.30E-02 | 1.4        |
